# Supplementary material for: Anchoring Ru nanoclusters to defect-rich polymeric carbon nitride as a bifunctional electrocatalyst for highly efficient overall water splitting
Source: Royal Society of Chemistry journal article supplement (doi:10.1039/d3ta02817h), 2023-01-01
Supplement: d3ta02817h1.pdf [file d3ta02817h1.pdf]

## Supporting Information

### **Anchoring Ru Nanoclusters into Defect-rich Polymeric Carbon Nitride as a Bifunctional Electrocatalyst for Highly Efficient Overall Water Splitting**

Jiayang Zhao<sup>a</sup>, Haoran Guo<sup>a</sup>, Yanyan Li<sup>a</sup>, Lirong Zheng<sup>b</sup>, Hao Ren<sup>a</sup>, Liyun Zhao<sup>a</sup>, and Rui Song<sup>a,\*</sup>

<sup>a</sup> School of Chemical Sciences, University of Chinese Academy of Sciences, 19 Yuquan Road, Shijingshan District, Beijing, 100049, PR China

<sup>b</sup> Beijing Synchrotron Radiation Facility, Institute of High Energy Physics, Chinese Academy of Sciences, 19 Yuquan Road, Shijingshan District, Beijing, 100049, PR China

\*Email: [rsong@ucas.ac.cn](mailto:rsong@ucas.ac.cn)

# Content

|              |                                                       |           |
|--------------|-------------------------------------------------------|-----------|
| <b>1</b>     | <b>Experimental Details .....</b>                     | <b>1</b>  |
| <b>1.1</b>   | <b>Chemicals and Materials .....</b>                  | <b>1</b>  |
| <b>1.2</b>   | <b>Synthesis of g-C<sub>3</sub>N<sub>4</sub>.....</b> | <b>1</b>  |
| <b>1.3</b>   | <b>Characterization .....</b>                         | <b>1</b>  |
| <b>1.4</b>   | <b>Electrochemical Measurements .....</b>             | <b>2</b>  |
| <b>1.4.1</b> | <b>Calculation of C<sub>dl</sub> and ECSA .....</b>   | <b>3</b>  |
| <b>1.4.2</b> | <b>Calculation of ESA<sub>CO</sub>.....</b>           | <b>3</b>  |
| <b>1.4.3</b> | <b>Calculation of TOF .....</b>                       | <b>3</b>  |
| <b>1.4.4</b> | <b>Calculation of mass activity.....</b>              | <b>4</b>  |
| <b>1.5</b>   | <b>XAFS Analysis .....</b>                            | <b>5</b>  |
| <b>1.6</b>   | <b>DFT Calculation .....</b>                          | <b>5</b>  |
| <b>2</b>     | <b>Results and Discussion.....</b>                    | <b>8</b>  |
| <b>3</b>     | <b>Appendix Table .....</b>                           | <b>36</b> |
| <b>4</b>     | <b>References.....</b>                                | <b>43</b> |

# 1 Experimental Details

## 1.1 Chemicals and Materials

Urea was purchased from Sinopharm. Ruthenium trichloride ( $\text{RuCl}_3$ ), Ru/C (5 wt%), and ethanol were purchased from Shanghai Maclean Biochemical Technology Co., Ltd. Platinum carbon (Pt/C, 20 wt%) was purchased from TKK (Tanaka). Ruthenium oxide ( $\text{RuO}_2$ ) was purchased from Original Equipment Manufacturer (OEM). Nafion solution (DuPont D520) was purchased from Du Pont China Holding Co., Ltd. All reagents received were used without further purification. Deionized water (18.2 M $\Omega$  cm) was used in all the experiments.

## 1.2 Synthesis of g- $\text{C}_3\text{N}_4$

The  $\text{C}_3\text{N}_4$ -precursor was prepared by thermal polymerization of urea. In details, 15 g urea was placed in ceramic crucible and then heated at 550 °C for 4 h at a ramp rate of 2.5 °C/min in a muffle furnace. Exfoliated g- $\text{C}_3\text{N}_4$  was obtained via thermal exfoliation. To be specific, 0.25 g  $\text{C}_3\text{N}_4$ -precursor was heated at 550 °C under the same heating rate for 5 h.

## 1.3 Characterization

- 1) Scanning electron microscopy (SEM) was carried out on a Hitachi SU8220.
- 2) Transmission electron microscopy (TEM) and energy-dispersive X-ray spectroscopy (EDS) elemental mapping attached to the TEM was performed on an FEI Talos 200X instrument operating an FEG cathode at 200 kV and equipped with the Super-X in-column EDS detector.
- 3) X-ray diffraction (XRD) was characterized on a Rigaku Smartlab diffractometer with Cu  $K\alpha$  ( $\lambda = 1.5406 \text{ \AA}$ ) radiation.
- 4) The Fourier transform infrared (FT-IR) spectra was recorded with a Vertex 70 spectrophotometer (Bruker Optik GmbH, Germany). The same amount of sample is taken during the test.
- 5) UV-vis diffuse reflectance spectra were acquired by a spectrophotometer (UV-3600Plus) and  $\text{BaSO}_4$  was used as the reflectance standard.
- 6) Electron paramagnetic resonance (EPR) was measured by an A300-10/12 of Bruker, Germany.

- 7) The inductively coupled plasma optical emission spectrometry was conducted on Agilent ICPOES730.
- 8) The elemental analysis was measured on a vario UNICUBE elemental.
- 9) X-ray photoelectron spectra (XPS) were measured by a Thermo Scientific ECSALab 250Xi X-ray photoelectron spectrometer with an Al K $\alpha$  X-ray radiation (1486 eV).
- 10) Nitrogen absorption/desorption isotherms were measured on a Micromeritics ASAP2460 instrument and after the samples were degassed about 24 h at 60 °C and the specific surface areas were calculated by the Brunauer-Emmett-Teller (BET) method.
- 11) The X-ray absorption fine structure data were collected at 1W1B station in Beijing Synchrotron Radiation Facility (BSRF). The storage rings of BSRF were operated at 2.5 GeV with a maximum current of 250 mA.

## 1.4 Electrochemical Measurements

All the electrochemical measurements were conducted in a standard three-electrode setup on CHI 660E electrochemical workstation (Chenhua Instruments, Shanghai, China), using carbon papers electrode modified with catalysts as a working electrode, a graphite rod as counter electrode and Hg/HgO (filled in 1 M KOH) electrode as reference electrode. For the preparation of catalyst inks, 5 mg catalysts were dispersed in the mixture of 650  $\mu\text{L}$  C<sub>2</sub>H<sub>6</sub>O and 300  $\mu\text{L}$  H<sub>2</sub>O by sonicating for 40 min. Then the 50  $\mu\text{L}$  Nafion solution was added in the solution, and sonicated for 20 min. Afterwards, the 150  $\mu\text{L}$  homogeneous suspension was drop onto carbon papers electrode where the total effective loading surface area is 0.25 cm<sup>2</sup>, and the mass loading is 3.0 mg cm<sup>-2</sup>.

Multiple cyclic voltammetry (CV) scans were firstly performed at a scan rate of 10 mV s<sup>-1</sup> until reached a stable state of electrodes. Then, linear sweep voltammetry (LSV) was conducted with a scan rate of 2 mV s<sup>-1</sup> in 1 M KOH solution. The electrochemical impedance spectroscopy (EIS) measurements were carried out at different overpotential for HER and OER over a frequency range from 100 kHz to 0.01 Hz with an amplitude of 10 mV. The long-term stability was tested by chronopotentiometry and multi-current steps. All the polarization curves were corrected using 90% iR compensation. Potentials were referenced to the reversible hydrogen electrode (RHE):  $E_{(\text{RHE})} = E_{(\text{Hg}/\text{HgO})} + 0.098 + 0.059 \text{ pH}$ . The overpotential

( $\eta$ ) was calculated according to the following equation:  $\eta_{(\text{HER})} = E_{(\text{RHE})} - 0 \text{ V}$ ;  $\eta_{(\text{OER})} = E_{(\text{RHE})} - 1.23 \text{ V}$ .

#### 1.4.1 Calculation of $C_{dl}$ and ECSA

The double layer capacitance ( $C_{dl}$ ) of all catalysts was estimated in non-Faradaic potential windows and calculated by plotting  $(J_a - J_c)/2$  versus the scan rate  $V_s$ , where  $j_a$  and  $j_c$  are the anodic and cathodic current density using the equation:

$$C_{dl} = \frac{VQ}{V} = \frac{J_a - J_c}{v} \quad (1.)$$

The electrochemically active surface area (ECSA) of the material can be calculated by dividing  $C_{dl}$  by the specific capacitance ( $C_s$ ) of the material:

$$ECSA = \frac{C_{dl}}{C_s} \quad (2.)$$

Where  $C_s$  is the specific capacitance, chosen as  $C_s = 0.040 \text{ mF cm}^{-2}$  in 1 M KOH based on reported values.

#### 1.4.2 Calculation of $ESA_{CO}$

CO stripping experiment was carried out with the method reported by Gasteiger et al.<sup>1, 2, 3</sup> In detail, CO adsorption was conducted in 1 M KOH with CO bubbling for 20 min. After equilibrated for 10 min, the electrolyte was saturated with nitrogen by bubbling nitrogen for 30 min. During all the above processes, the potential was held at 0.1 V. Then the CV curves were collected positively from the adsorption potential of 0.1 V, then within the range of 0~1 V (vs. RHE) at a scan rate of  $10 \text{ mV s}^{-1}$ . According to the results of CO stripping,  $ESA_{CO}$  value of Ru NCs/ $V_N$ - $C_3N_4$  were determined by assuming that the electrooxidation of one CO\* monolayer required a charge density of  $420 \mu\text{C cm}_{Ru}^{-2}$ .<sup>4, 5</sup>

#### 1.4.3 Calculation of TOF

The TOF value was calculated according to the previous report, and the detail was described as below (Take Ru NCs/ $V_N$ - $C_3N_4$  as an example):

$$\text{TOF} = \frac{\text{Total Hydrogen turnovers} / \text{geometric area}}{\text{Active sites} / \text{geometric area}} \quad (3.)$$

The number of total hydrogen turnovers was calculated from the current density derived from the LSV curve according to the following equation:

$$\begin{aligned} & \text{Total oxygen turnovers} \\ & = (|j| \text{ mA/cm}^2) \left( \frac{1 \text{ C/s}}{1000 \text{ mA}} \right) \left( \frac{1 \text{ mol e}^-}{96485 \text{ C}} \right) \left( \frac{1 \text{ mol}}{4 \text{ mol e}^-} \right) \left( \frac{6.02 \times 10^{23} \text{ molecules O}_2}{1 \text{ mol O}_2} \right) \\ & = 1.560 \times 10^{15} \text{ O}_2/\text{s cm}^2 \text{ per mA/cm}^2 \end{aligned} \quad (4.)$$

The number of active sites in Ru NCs/V<sub>N</sub>-C<sub>3</sub>N<sub>4</sub>, RuCl<sub>x</sub>-C<sub>3</sub>N<sub>4</sub>, commercial Ru/C and RuO<sub>2</sub> catalysts were calculated from the mass loading on the work electrode. The Ru atomic weight was determined by ICP data, assuming each Ru center accounts for one active site:

$$\begin{aligned} & \text{The number of active sites} \\ & = \left( \frac{\text{catalyst loading per geometric area (g/cm}^2) \times \text{Ru wt}\%}{101.07 \text{ g/mol}} \right) \left( \frac{6.02 \times 10^{23} \text{ Ru atoms}}{1 \text{ mol Ru}} \right) \\ & = \left( \frac{3.0 \times 10^{-3} \text{ (g/cm}^2) \times 5.572 \text{ wt}\%}{101.07 \text{ g/mol}} \right) \left( \frac{6.02 \times 10^{23} \text{ Ru atoms}}{1 \text{ mol Ru}} \right) \\ & = 9.956 \times 10^{17} \text{ Ru sites per cm}^2 \end{aligned} \quad (5.)$$

Finally, the current density value of LSV polarization curve under different overpotential is substituted into equation S3 to obtain TOF:

$$\text{TOF} = \left( \frac{1.560 \times 10^{15}}{9.956 \times 10^{17}} \times |j| \right) = 0.001566 \times |j|$$

#### 1.4.4 Calculation of mass activity

The mass activities of Ru NCs/V<sub>N</sub>-C<sub>3</sub>N<sub>4</sub>, RuCl<sub>x</sub>-C<sub>3</sub>N<sub>4</sub>, commercial Ru/C and RuO<sub>2</sub> catalysts were calculated at the overpotential of 100 mV (for HER) and the potential of 1.60 V (for OER), normalized to the Ru loadings. The mass activities of commercial Pt/C for HER and OER were normalized to the Pt loading. Detail was described as below (Take Ru NCs/V<sub>N</sub>-C<sub>3</sub>N<sub>4</sub> as an example):

$$\text{Mass activity} = \frac{\text{Current density (mA/cm}^2)}{\text{catalyst loading per geometric area (mg/cm}^2) \times \text{Ru wt}\%} \quad (6.)$$

For HER process:

$$\text{Mass activity} = \frac{448.9 \text{ (mA/cm}^2\text{)}}{3.0 \text{ (mg/cm}^2\text{)} \times 5.572\text{wt}\%} = 2685.5 \text{ A/g} \quad (7.)$$

For OER process:

$$\text{Mass activity} = \frac{401.0 \text{ (mA/cm}^2\text{)}}{3.0 \text{ (mg/cm}^2\text{)} \times 5.572\text{wt}\%} = 2398.9 \text{ A/g} \quad (8.)$$

## 1.5 XAFS Analysis

The acquired EXAFS data were processed according to the standard procedures using the ATHENA module implemented in the IFEFFIT software packages. The  $k^3$ -weighted EXAFS spectra were obtained by subtracting the post-edge background from the overall absorption and then normalizing with respect to the edge-jump step. Subsequently,  $k^3$ -weighted  $\chi(k)$  data of Fe K-edge were Fourier transformed to real (R) space using a hanning windows ( $dk=1.0 \text{ \AA}^{-1}$ ) to separate the EXAFS contributions from different coordination shells. To obtain the quantitative structural parameters around central atoms, least-squares curve parameter fitting was performed using the ARTEMIS module of IFEFFIT software packages.<sup>6, 7, 8</sup>

## 1.6 DFT Calculation

First-principles calculations were performed within the density functional theory framework.<sup>9</sup> The projector-augmented wave (PAW) method<sup>10, 11</sup> and the generalized gradient approximation (GGA)<sup>12</sup> for the exchange-correlation energy functional, as implemented in the Vienna ab initio simulation package (VASP)<sup>13, 14, 15</sup> were used. The GGA calculation was performed with the Perdew-Burke-Ernzerhof (PBE)<sup>16</sup> exchange-correlation potential. Considered long-range interaction between molecules/intermediates and surface, Van der Waals interactions were considered using DFT-D3 correlation.<sup>17</sup> To avoid effects come from other slabs, a vacuum of 15  $\text{\AA}$  was added along z direction. The convergence criterion of geometry relaxation was set to 0.01 eV $\cdot\text{\AA}^{-1}$  in force on each atom. The energy cutoff for plane wave-basis was set to 500 eV. The K points were sampled with 3 $\times$ 3 $\times$ 1 by Monkhorst-Pack method.

Free energies of each reaction steps were calculated as  $G = E_{\text{DFT}} + E_{\text{ZPE}} - T\Delta S$ , where  $E_{\text{DFT}}$  is the DFT calculated energy,  $E_{\text{ZPE}}$  and  $T\Delta S$  are calculated by DFT vibration frequency calculations.

For HER, the hydrogen adsorption free energy ( $\Delta G_{\text{H}^*}$ ) was calculated by the following equation:<sup>18</sup>

$$\Delta G_{\text{H}^*} = \Delta E_{\text{H}^*} + 0.24 \text{ eV} \quad (9.)$$

Where  $\Delta E_{\text{H}^*}$  is defined by the following equation:

$$\Delta E_{\text{H}^*} = E_{\text{H}^*} - (E_* + 1/2E_{\text{H}_2}) \quad (10.)$$

Where  $E_{\text{H}^*}$  is the total energy of H atom on the support,  $E_*$  is the total energy of support,  $E_{\text{H}_2}$  is the energy of the gas  $\text{H}_2$  calculated by setting the isolated  $\text{H}_2$  in a box of  $10.0 \text{ \AA} \times 10.0 \text{ \AA} \times 10.0 \text{ \AA}$ . The Gibbs free energy for the well-known highly efficient Pt catalyst is near-zero as  $|\Delta G_{\text{ads}}| \approx 0.09 \text{ eV}$ .<sup>19</sup>

For OER, the Gibbs free energy was calculated by the generally reported four electrons process:

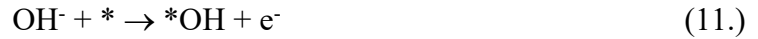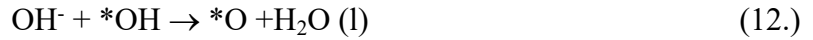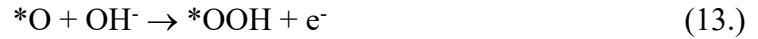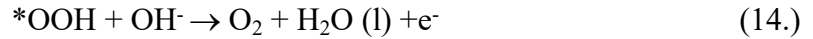

Where \* represents an adsorption site on the catalyst, and \*OH, \*O and \*OOH denote the corresponding adsorbed intermediates. Also, at standard conditions, the free energies change for all OER electrochemical steps ( $\Delta G_{1-4}$ ) can be expressed as:

$$\Delta G_1 = \Delta G_{*\text{OH}} \quad (15.)$$

$$\Delta G_2 = \Delta G_{*\text{O}} - \Delta G_{*\text{OH}} \quad (16.)$$

$$\Delta G_3 = \Delta G_{*\text{OOH}} - \Delta G_{*\text{O}} \quad (17.)$$

$$\Delta G_4 = 4.92 - \Delta G_{*\text{OOH}} \quad (18.)$$

Therefore, the theoretical overpotential  $\eta$  was obtained according to the equation:

$$\eta = \max [\Delta G_1, \Delta G_2, \Delta G_3, \Delta G_4] / \text{e} - 1.23 \text{ V} \quad (19.)$$

The change in free energy ( $\Delta G$ ) of per reaction step was calculated as following:<sup>20</sup>

$$\Delta G = \Delta E + \Delta \text{ZPE} - T \cdot \Delta S + \Delta G_{\text{U}} + \Delta G_{\text{pH}} \quad (20.)$$

Where  $\Delta E$  is the change of the total reaction energy obtained from DFT calculation,  $\Delta \text{ZPE}$  is the change of the zero-point energy, T is the temperature (300 K), and  $\Delta S$  is



the change of the entropy.  $\Delta G_U = -eU$ , where  $U$  is the potential at the electrode and  $e$  is the transferred charge.  $\Delta G_{pH} = k_B \cdot T \times \ln 10 \times \text{pH}$ , where  $k_B$  is the Boltzmann constant and  $T = 300$  K. In this work, the influence of pH was neglected. The free energy of  $O_2$  is obtained from the reaction  $O_2 + 2H_2 \rightarrow 2H_2O$ , which is 4.92 eV at 300 K and a pressure of 0.035 bar. The free energy of  $OH^-$  is defined as  $G(H_2O) - G(H^+)$ , and the free energy of  $H^+$  is equal to  $1/2H_2$ . The entropies of molecules (including  $O_2$ ,  $H_2$ , and  $H_2O$ , etc.) in the gas (or liquid) phase are taken from the ‘‘CRC Handbook of Chemistry and Physics’’.<sup>21</sup>

The d-band center was calculated based on the following equation:

$$\epsilon_d = \frac{\int_{-\infty}^{\infty} \rho(x)x dx}{\int_{-\infty}^{\infty} \rho(x) dx} \quad (21.)$$

Where  $\rho(x)$  is the PDOS at the energy of  $x$ .

## 2 Results and Discussion

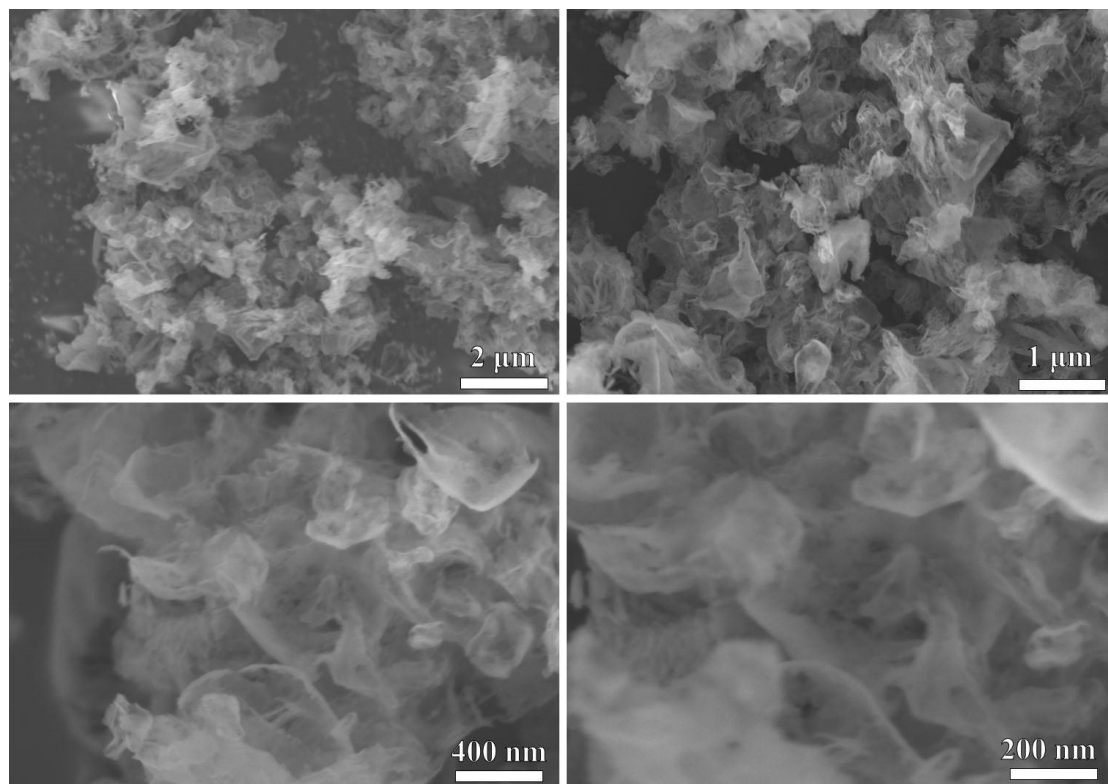

**Fig. S1** SEM images of g-C<sub>3</sub>N<sub>4</sub> at different magnifications.

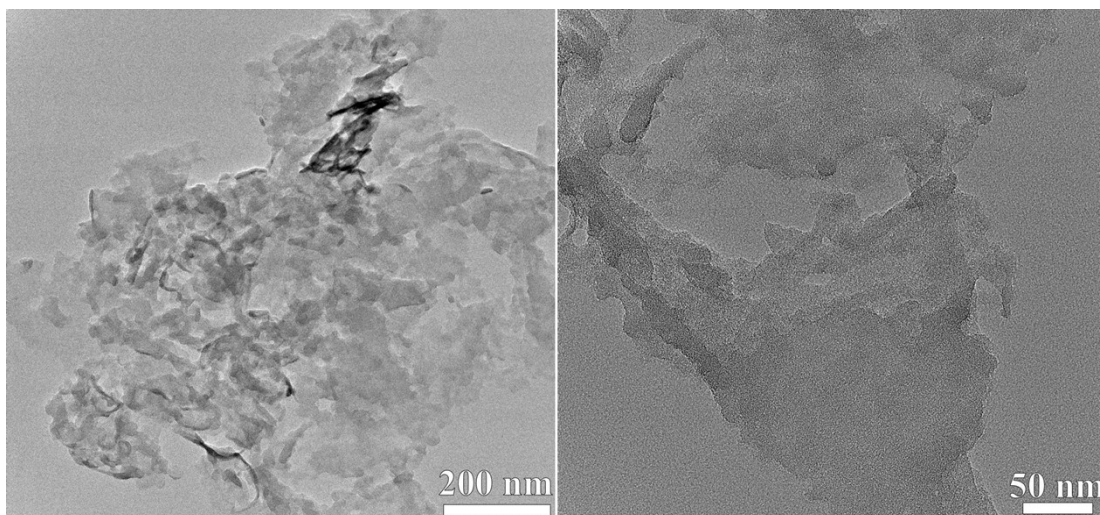

**Fig. S2** TEM images of g-C<sub>3</sub>N<sub>4</sub> at different magnifications.

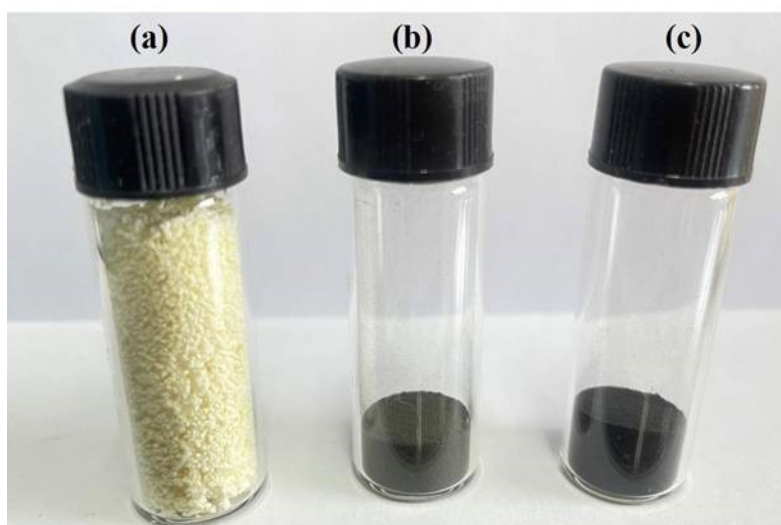

**Fig. S3** Photographs of (a)  $g\text{-C}_3\text{N}_4$ , (b)  $\text{RuCl}_x\text{-C}_3\text{N}_4$ , and (c)  $\text{Ru NCs/V}_\text{N}\text{-C}_3\text{N}_4$ .

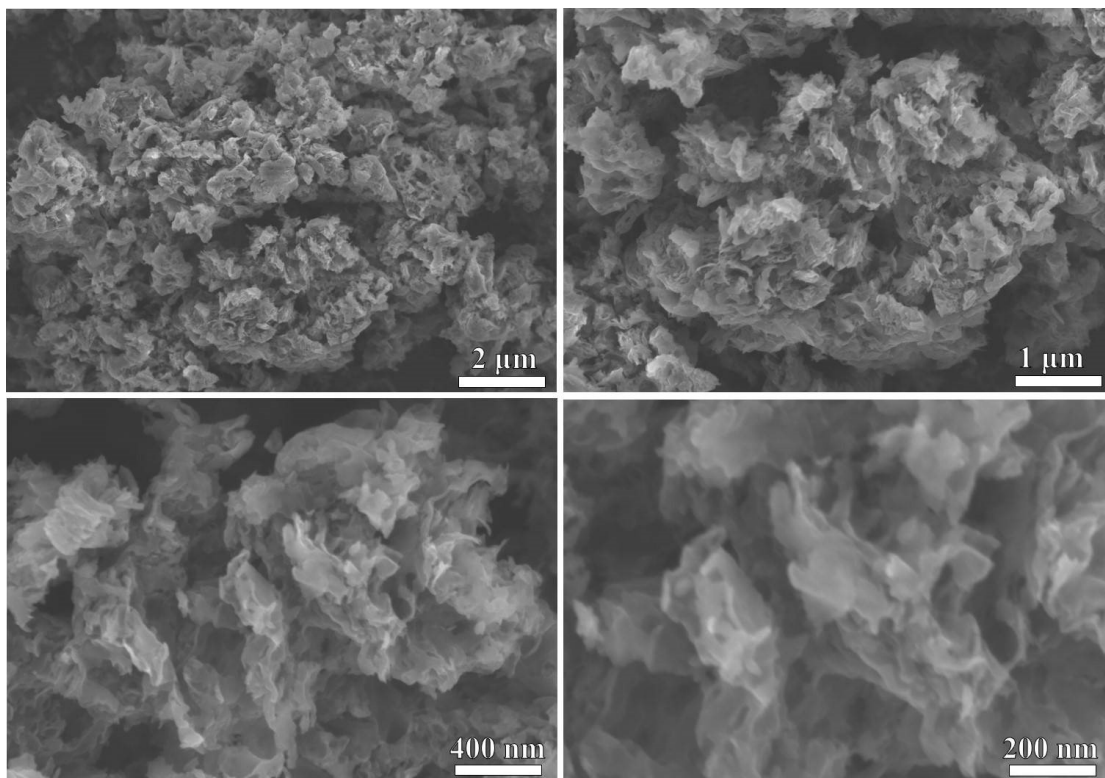

**Fig. S4** SEM images of RuCl<sub>x</sub>-C<sub>3</sub>N<sub>4</sub> at different magnifications.

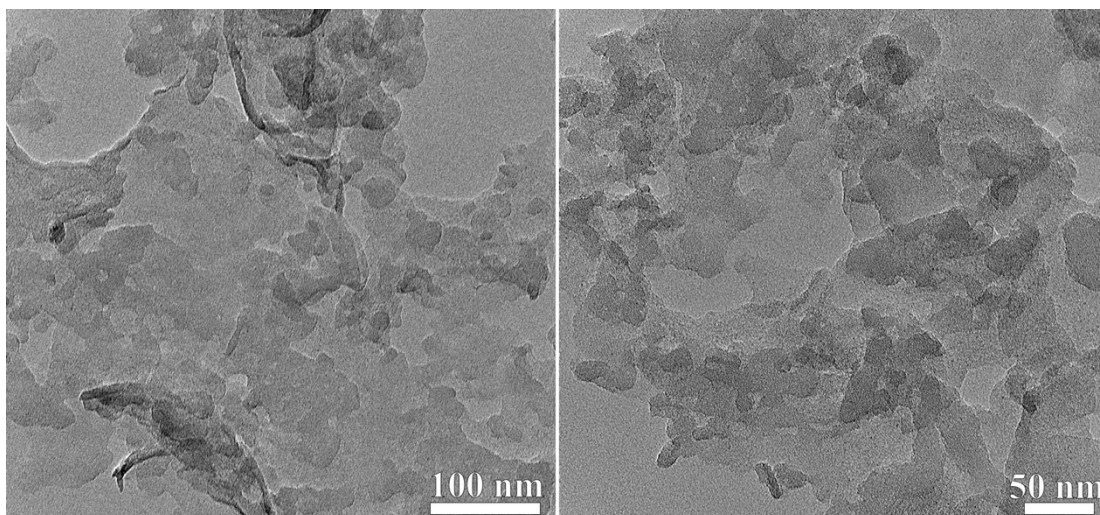

**Fig. S5** TEM images of RuCl<sub>x</sub>-C<sub>3</sub>N<sub>4</sub> at different magnifications.

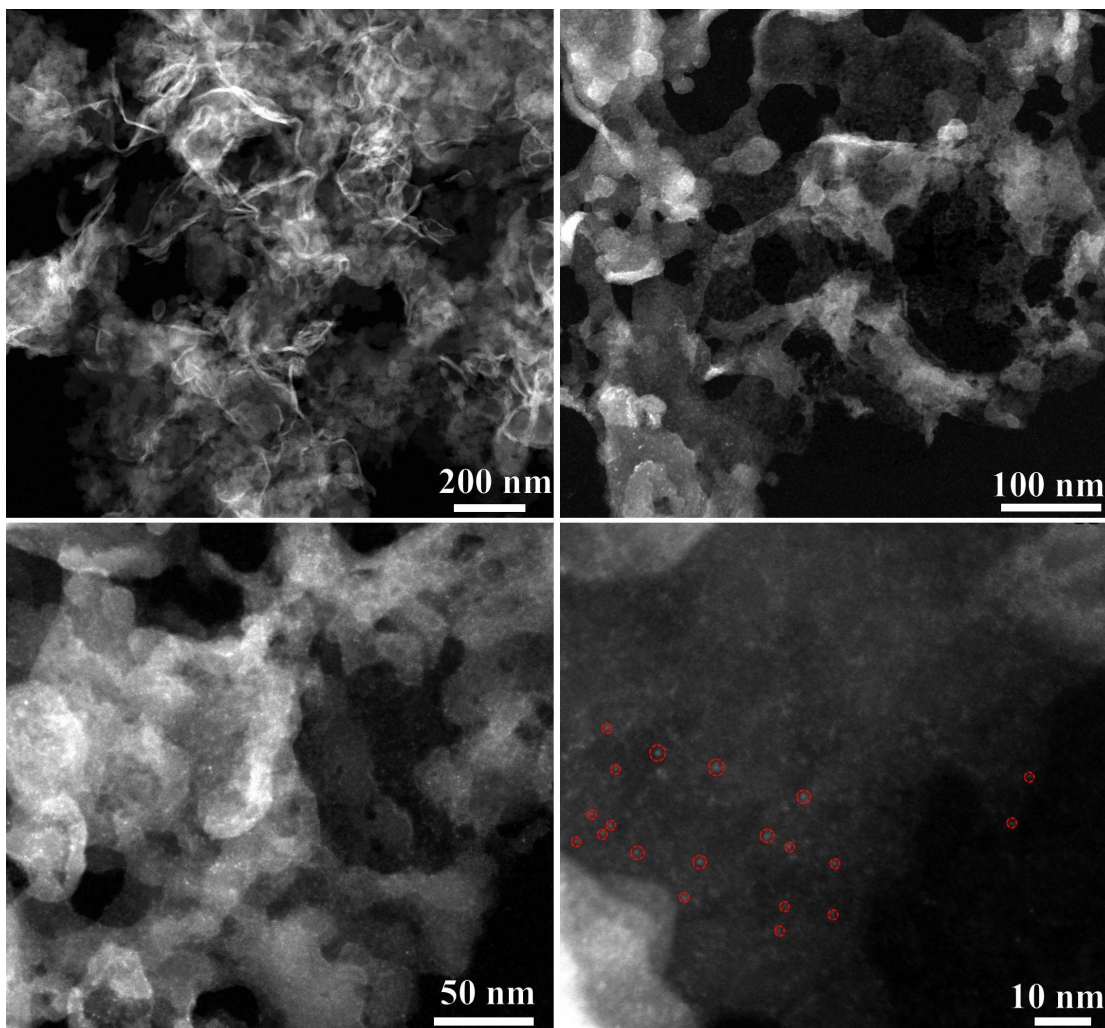

**Fig. S6** HAADF-STEM images of  $\text{RuCl}_x\text{-C}_3\text{N}_4$ .

Each bright spot (as shown in the red circles) represents Ru nano-species that are evenly dispersed in the carbon matrix without aggregating.

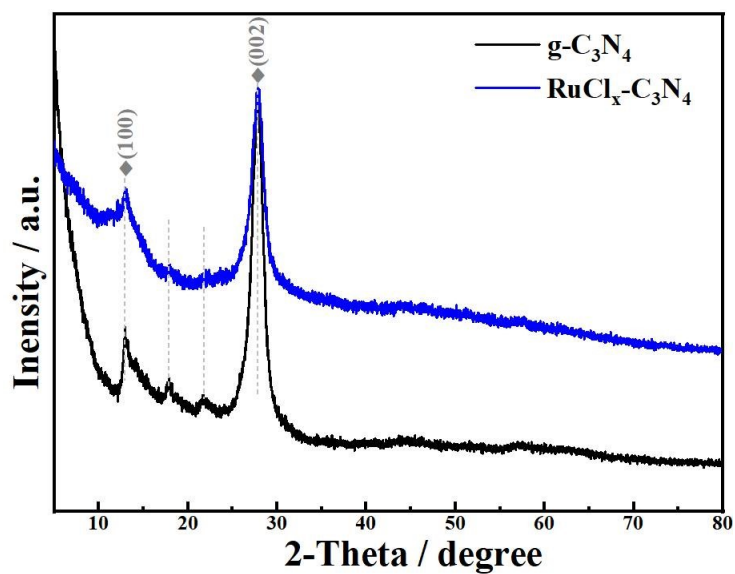

**Fig. S7** XRD patterns of the  $g\text{-C}_3\text{N}_4$  and  $\text{RuCl}_x\text{-C}_3\text{N}_4$ .

The  $g\text{-C}_3\text{N}_4$  and  $\text{RuCl}_x\text{-C}_3\text{N}_4$  manifests similar X-ray diffraction (XRD) patterns with two diffraction peaks at  $13.0^\circ$  and  $27.4^\circ$ , corresponding to the (100) and (002) planes of  $g\text{-C}_3\text{N}_4$ , respectively (**Fig. S7**).<sup>22</sup> Noting that no obvious peak of Ru species was detected for  $\text{RuCl}_x\text{-C}_3\text{N}_4$  due to the small size of Ru nano-species.



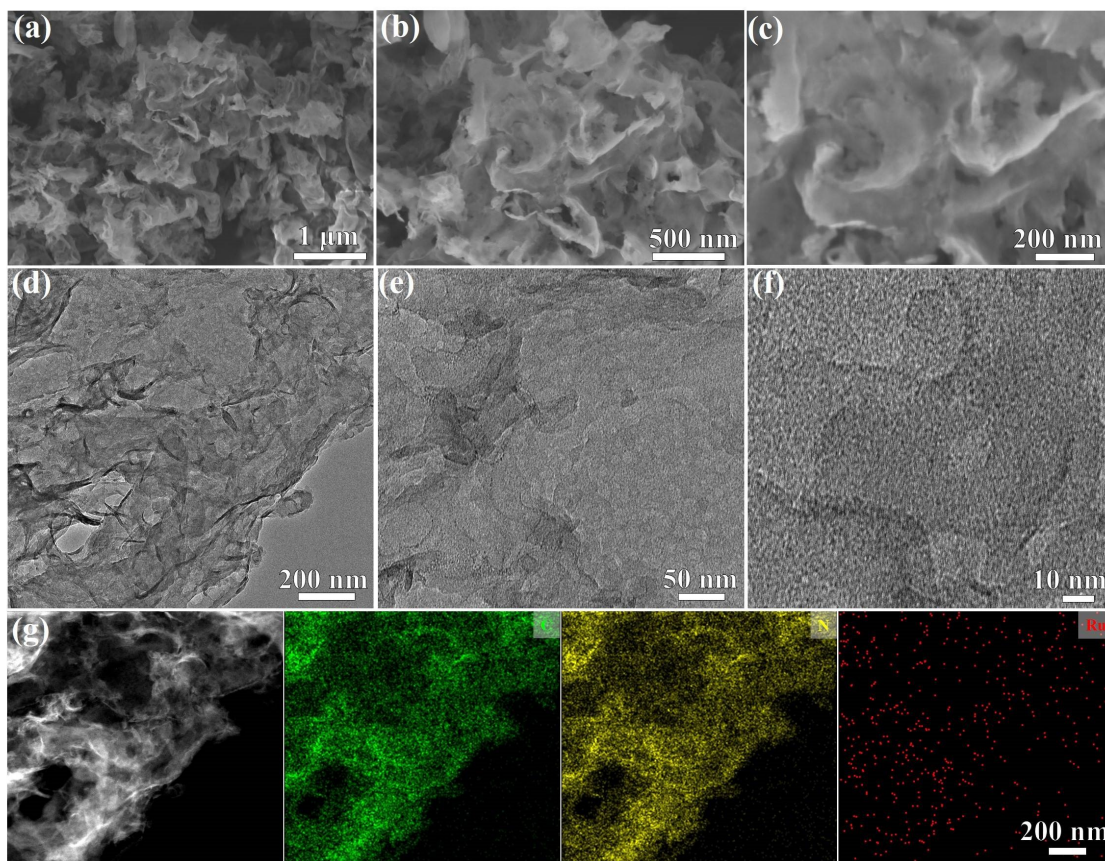

**Fig. S8** (a)-(c) SEM images and (d)-(f) TEM images of RuCl<sub>x</sub>-C<sub>3</sub>N<sub>4</sub>-350 °C at different magnifications. (g) HAADF-STEM image of RuCl<sub>x</sub>-C<sub>3</sub>N<sub>4</sub>-350 °C and the EDS mapping of Ru, C and N.

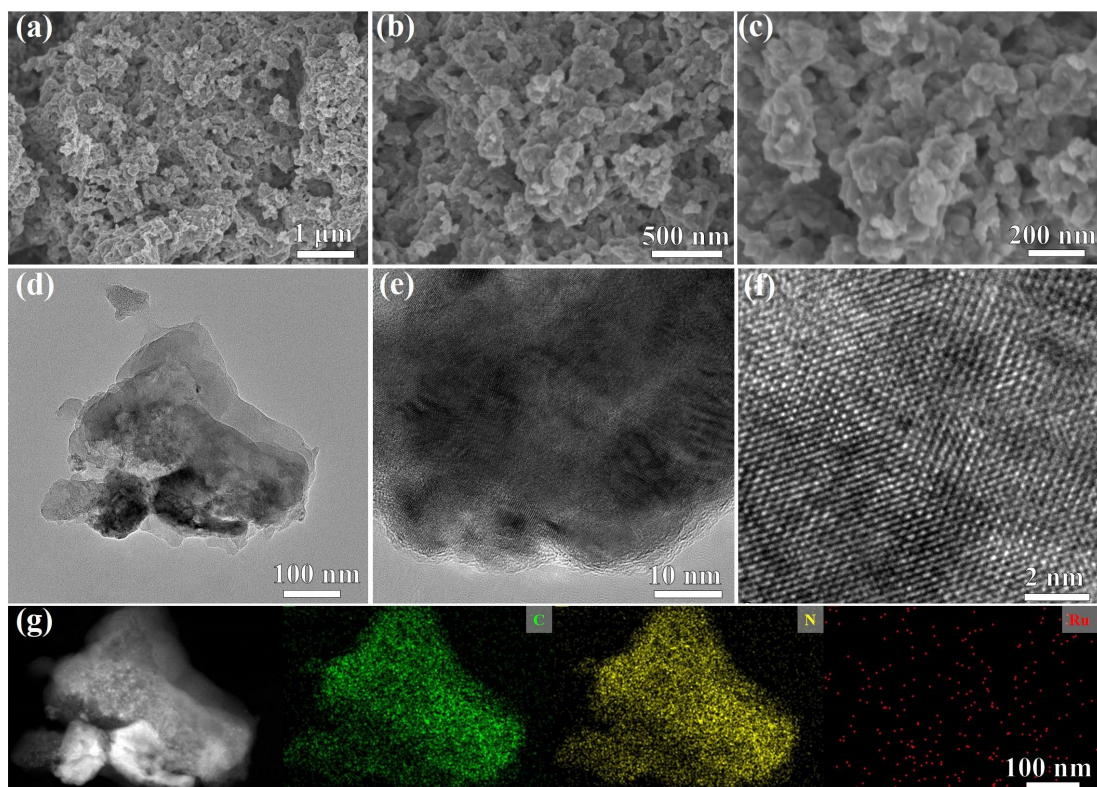

**Fig. S9** (a)-(c) SEM images, (d) TEM image and (e)-(f) HRTEM images of RuCl<sub>x</sub>-C<sub>3</sub>N<sub>4</sub>-550 °C at different magnifications. (g) HAADF-STEM image of RuCl<sub>x</sub>-C<sub>3</sub>N<sub>4</sub>-550 °C and the EDS mapping of Ru, C and N.

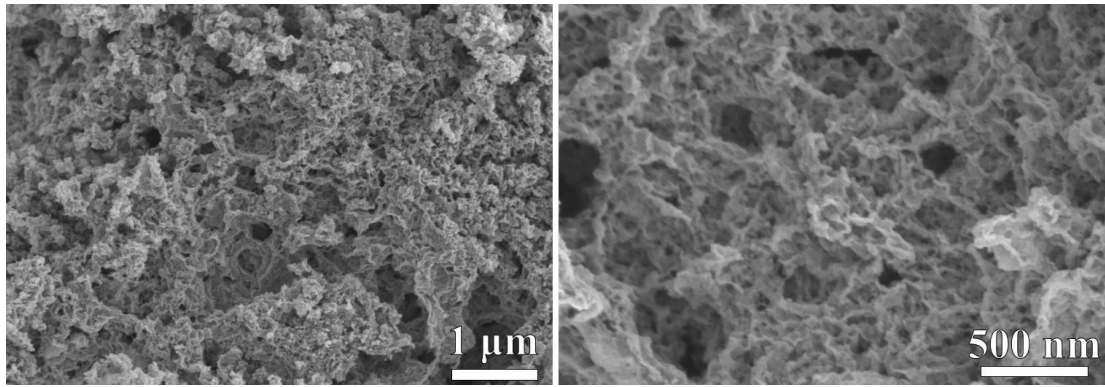

**Fig. S10** SEM images of RuCl<sub>x</sub>-C<sub>3</sub>N<sub>4</sub>-450 °C at different magnifications.

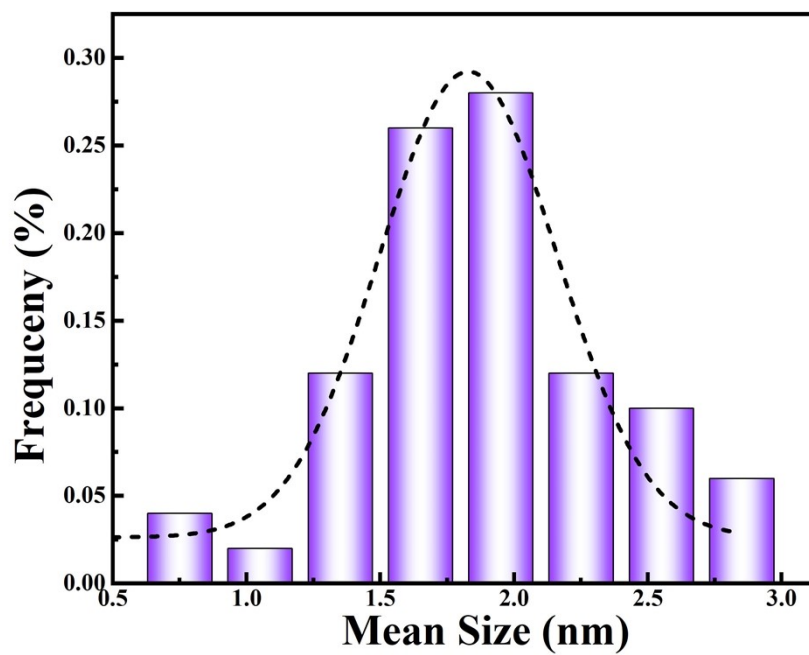

**Fig. S11** The size statistics of nanoparticles in region I.

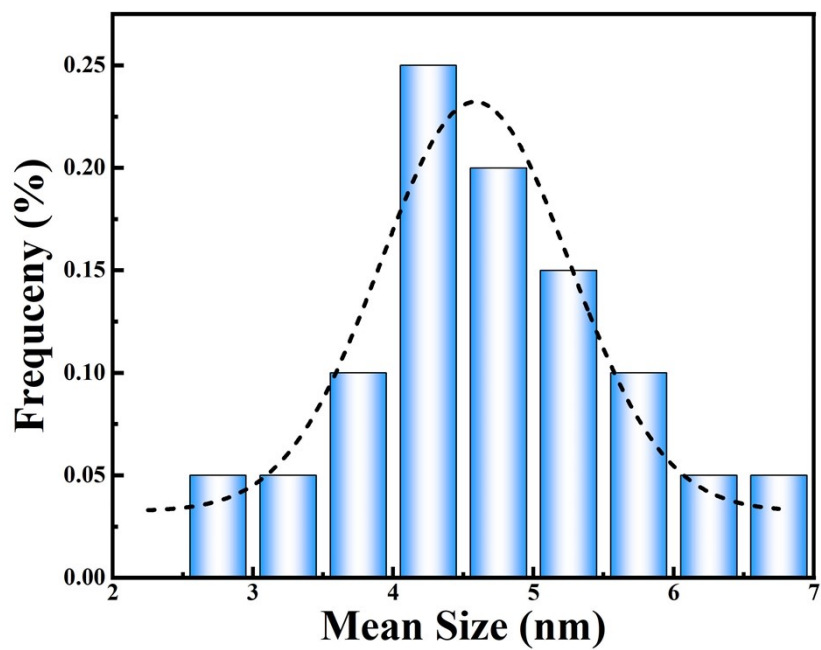

**Fig. S12** The size statistics of nanoparticles in region II.

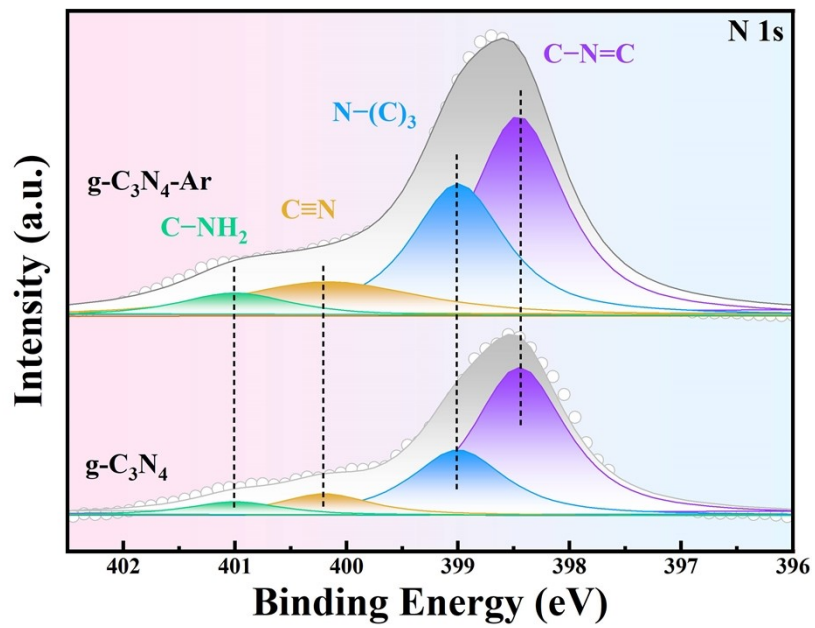

**Fig. S13** High-resolution XPS spectra of N 1s for g-C<sub>3</sub>N<sub>4</sub> and g-C<sub>3</sub>N<sub>4</sub>-Ar.

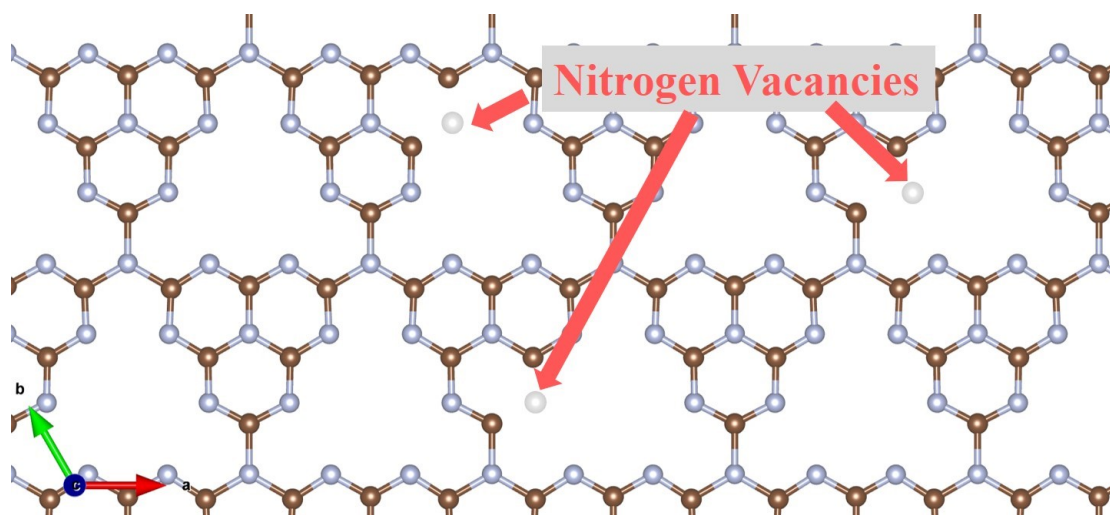

**Fig. S14** Schematic illustration for nitrogen vacancies at the pyridinic nitrogen sites.

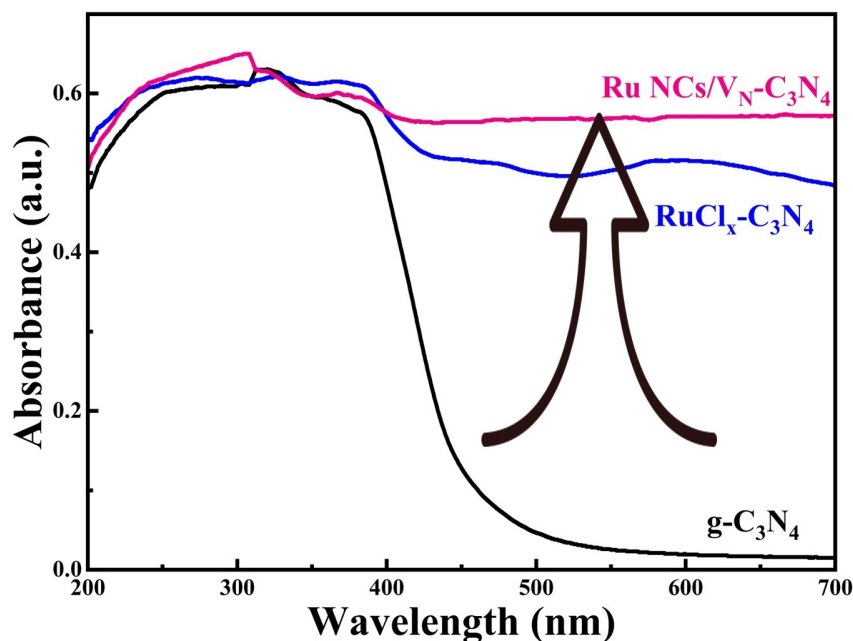

**Fig. S15** UV-Vis diffuse reflection spectra of  $g\text{-C}_3\text{N}_4$ ,  $\text{RuCl}_x\text{-C}_3\text{N}_4$  and  $\text{Ru NCs/V}_N\text{-C}_3\text{N}_4$ .

It is noteworthy that the color of  $g\text{-C}_3\text{N}_4$  is yellow, whereas the color changes to greenish-brown and black for  $\text{RuCl}_x\text{-C}_3\text{N}_4$  and  $\text{Ru NCs/V}_N\text{-C}_3\text{N}_4$ . These color changes are consistent with the much wider and stronger absorption spectra. For  $g\text{-C}_3\text{N}_4$ , the absorption band typically appears in the blue part of the visible region. When incorporating into Ru species, the absorption band of  $\text{RuCl}_x\text{-C}_3\text{N}_4$  at the visible wavelength region was significantly enhanced, which corroborates the destabilization of the stable conjugated  $\pi$  electron network of the  $\text{C}_3\text{N}_4$  framework, implying the interactive reaction toward  $\text{C}_3\text{N}_4$  and Ru species. After annealing, the absorption band of  $\text{Ru NCs/V}_N\text{-C}_3\text{N}_4$  at 400-700 nm was further enhanced, suggesting the formation of abundant  $\text{V}_N$  was beneficial to increase  $\pi$  electron transition and delocalization in the conjugated system.



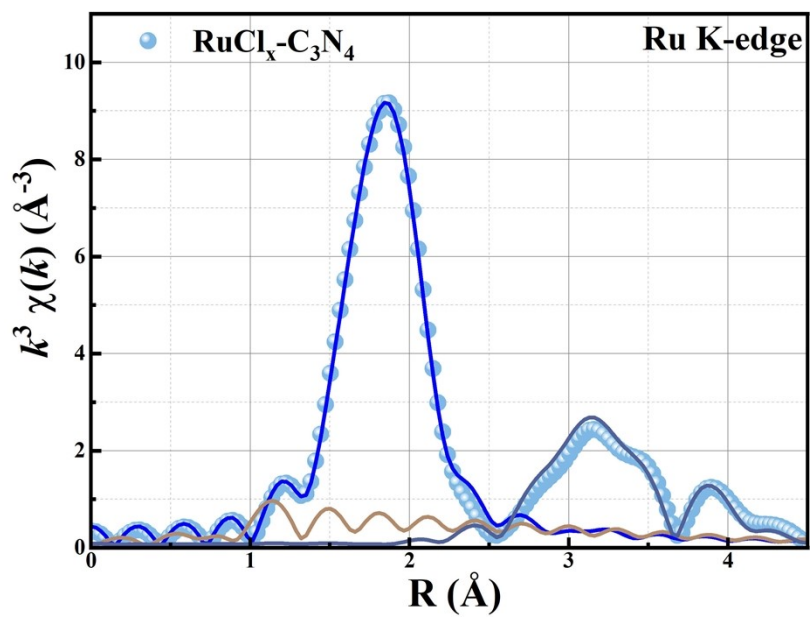

**Fig. S16** First-shell fitting of EXAFS spectra of  $\text{RuCl}_x\text{-C}_3\text{N}_4$ .

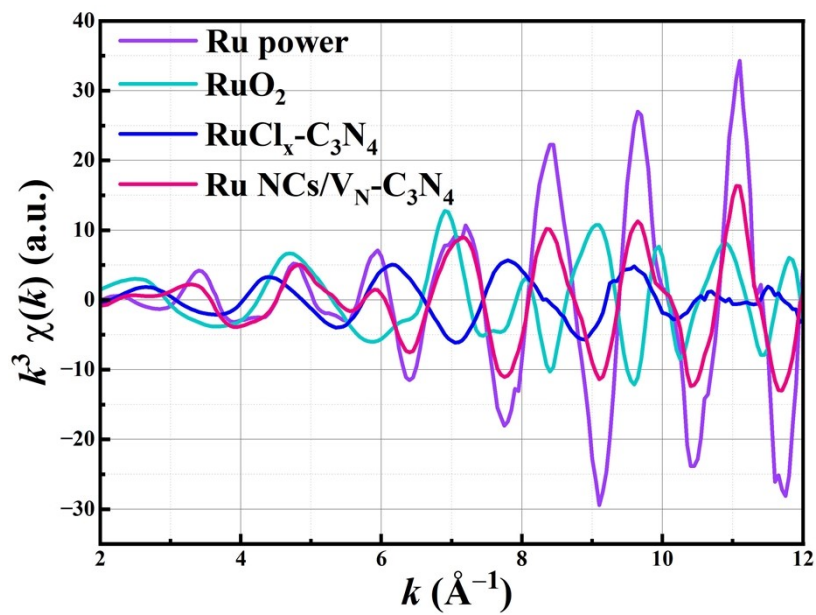

**Fig. S17** Ru K-edge EXAFS of oscillations.

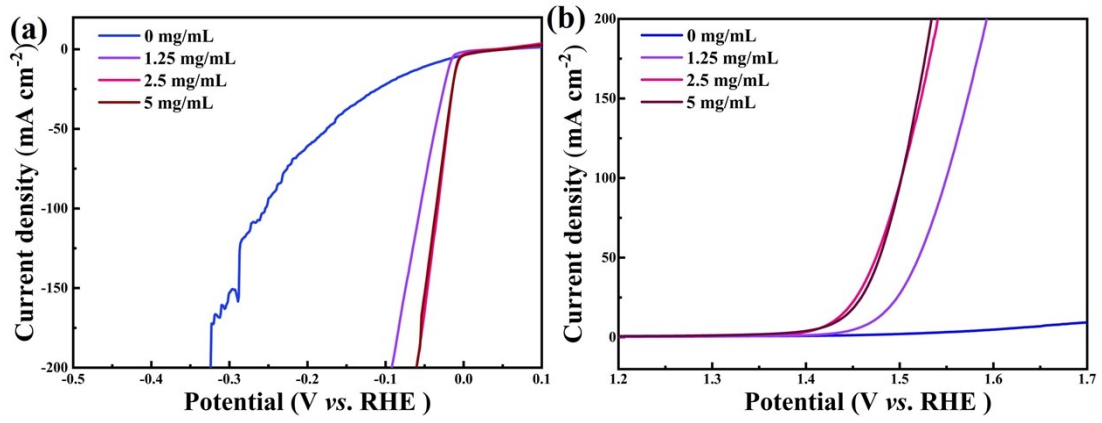

**Fig. S18** LSV curves of samples with RuCl<sub>3</sub> solution in different concentrations.

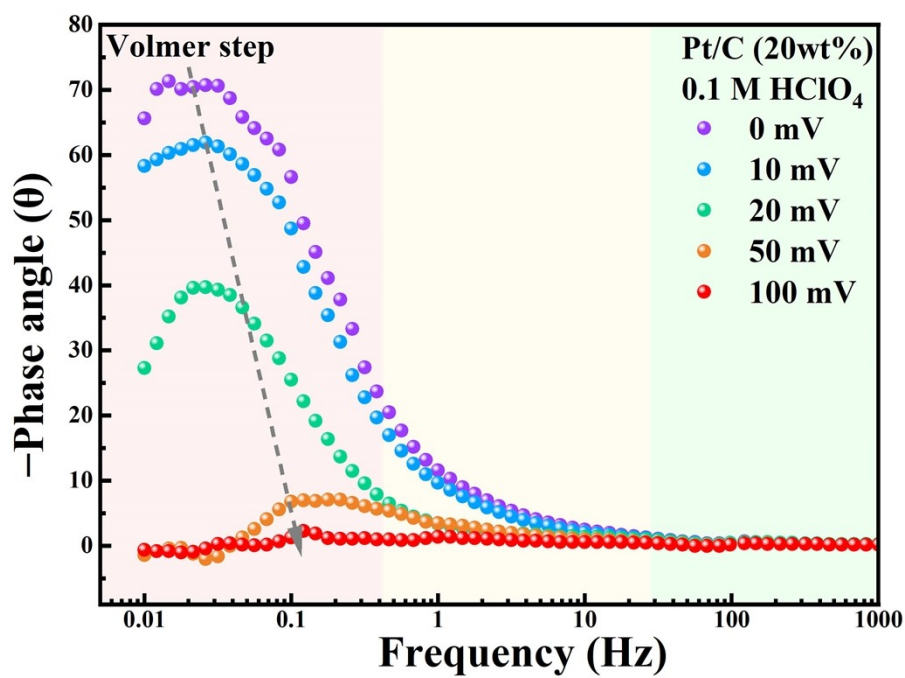

**Fig. S19** Operando Bode plots of commercial Pt/C at various overpotential in 0.1 M HClO<sub>4</sub>.

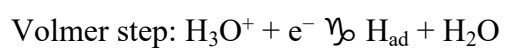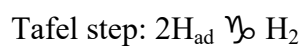

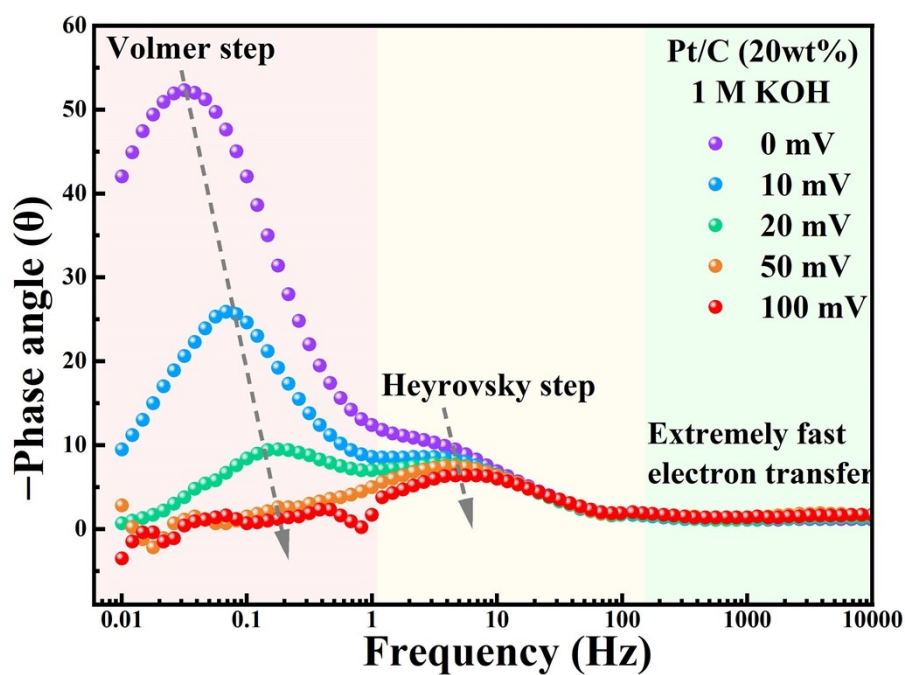

**Fig. S20** Operando Bode plots of commercial Pt/C at various overpotential in 1 M KOH.

The phase angle reduced quickly at the low-frequency region, and decreased tardily at the middle-frequency region, meaning the Volmer-Heyrovsky mechanism of Pt/C with Heyrovsky step as RDS.

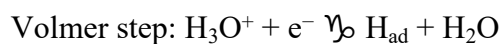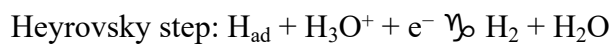

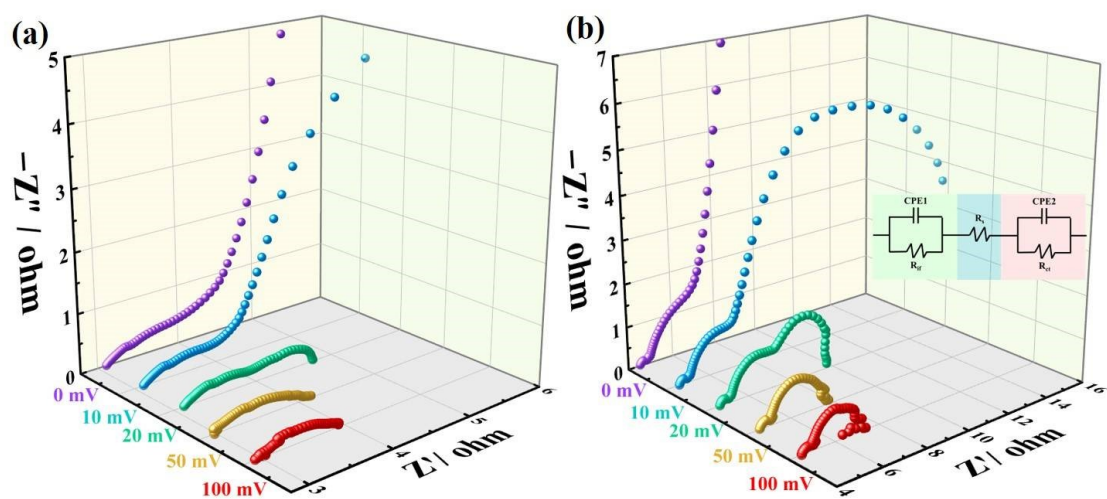

**Fig. S21** Operando Nyquist plots of (a) Ru NCs/ $V_N$ - $C_3N_4$  and (b) Pt/C at various voltages in 1 M KOH. The inset was equivalent circuit.<sup>23</sup>

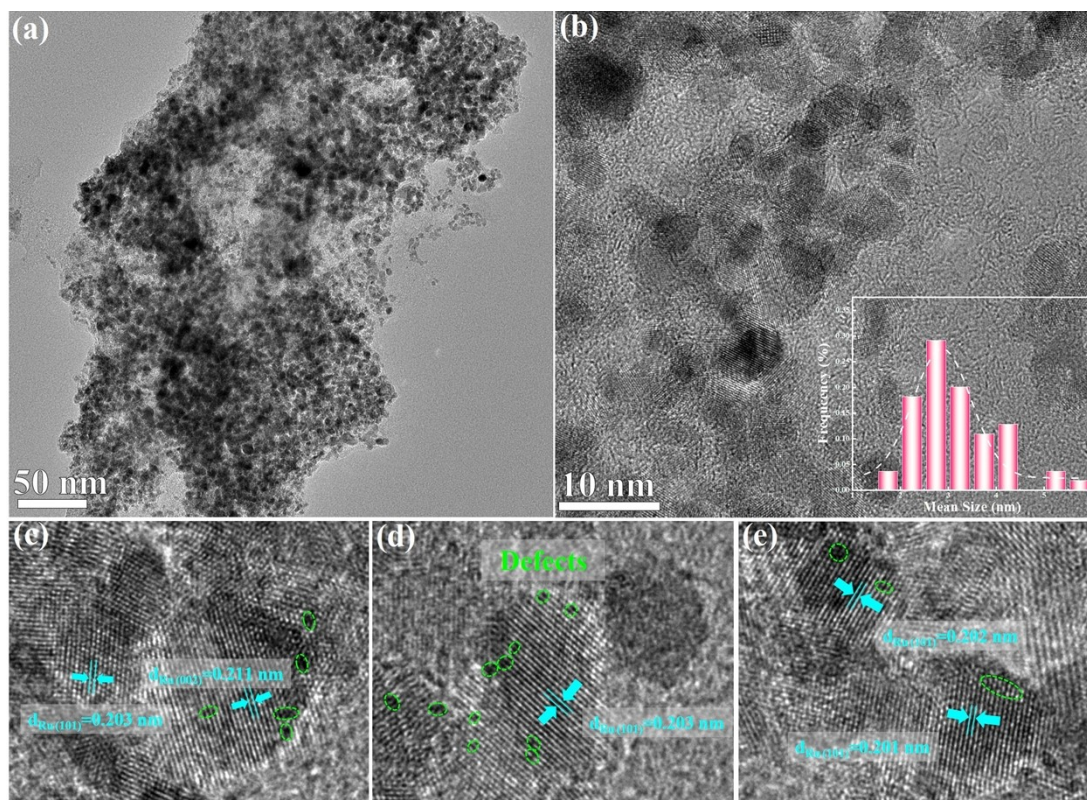

**Fig. S22** (a) TEM and (b-e) HRTEM images of Ru NCs/V<sub>N</sub>-C<sub>3</sub>N<sub>4</sub> after long-term HER stability test.

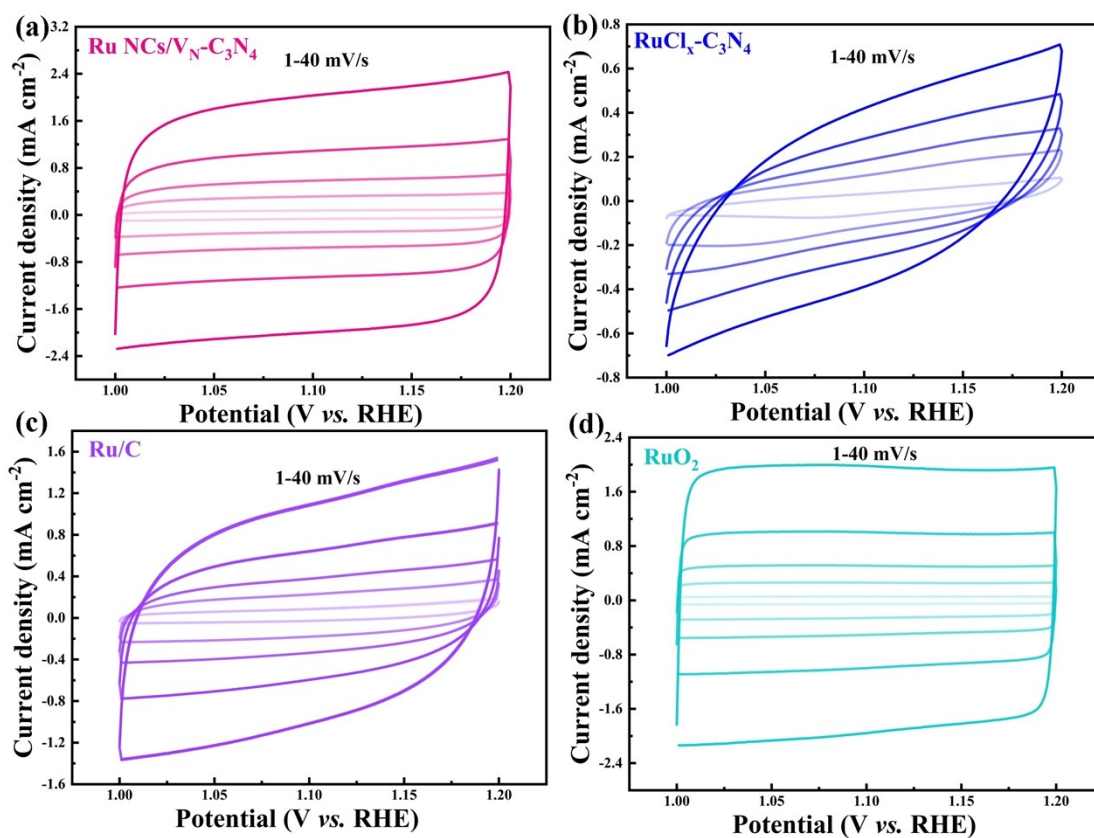

**Fig. S23** CV curves of (a) Ru NCs/ $V_N$ - $C_3N_4$ , (b)  $RuCl_x$ - $C_3N_4$ , (c) Ru/C, and (d)  $RuO_2$  at varying scan rates (1, 5, 10, 20, 40  $mV s^{-1}$ ).



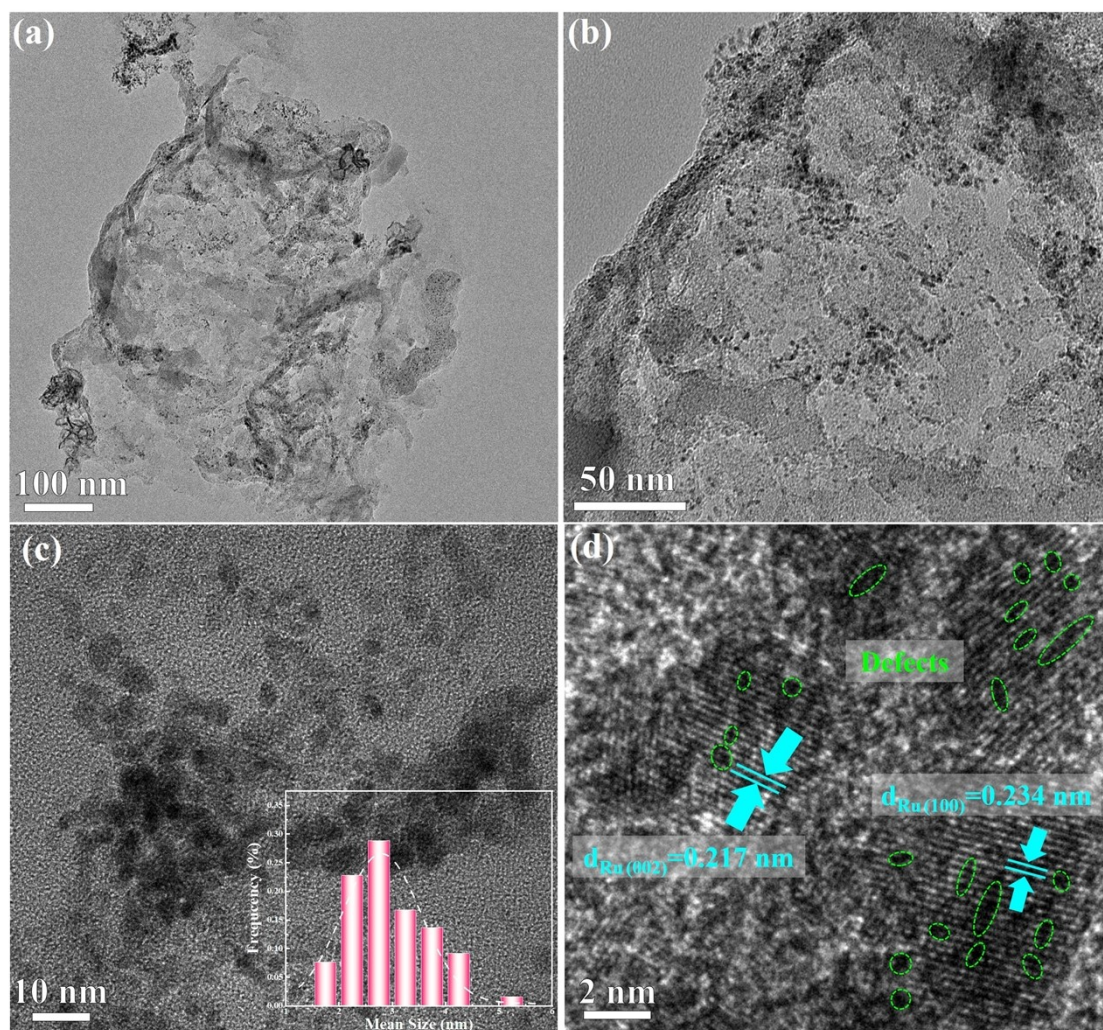

**Fig. S24 (a-b)** TEM and **(c-d)** HRTEM images of Ru NCs/V<sub>N</sub>-C<sub>3</sub>N<sub>4</sub> after long-term OER stability test.

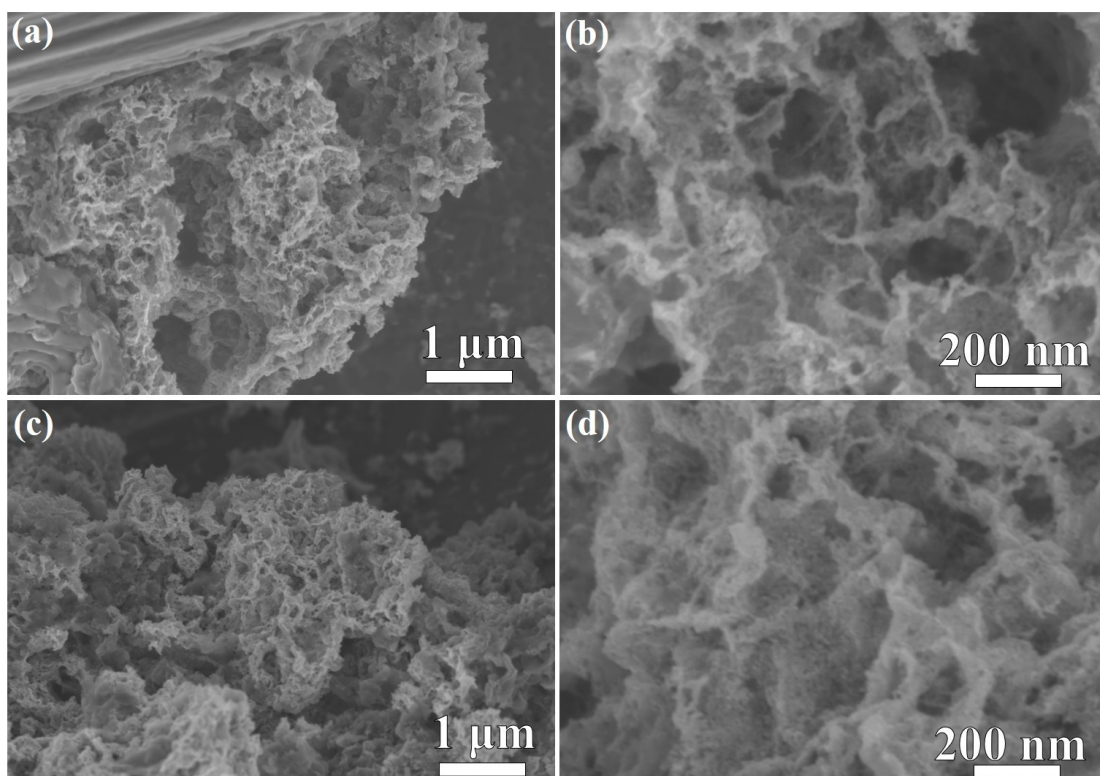

**Fig. S25** (a-b) SEM images of Ru NCs/ $V_N$ - $C_3N_4$  at cathode after long-term electrolysis. (c-d) SEM images of Ru NCs/ $V_N$ - $C_3N_4$  at anode after long-term electrolysis.

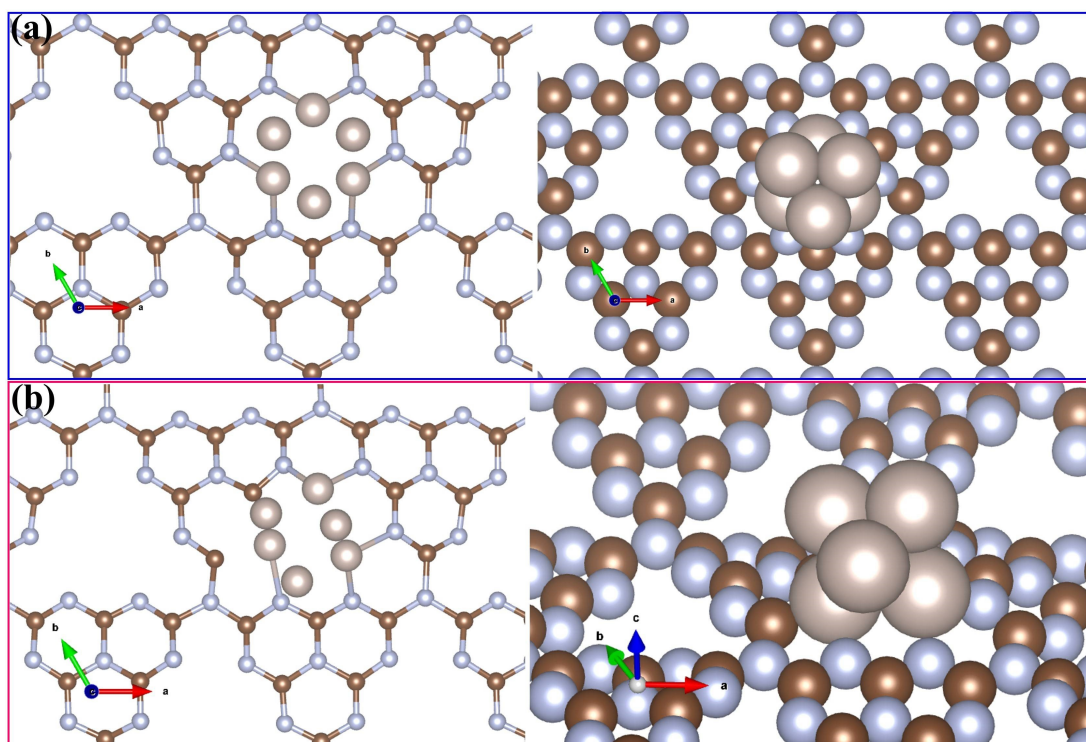

**Fig. S26** The structure model for (a) Ru NCs/C<sub>3</sub>N<sub>4</sub> and (b) Ru NCs/V<sub>N</sub>-C<sub>3</sub>N<sub>4</sub>.

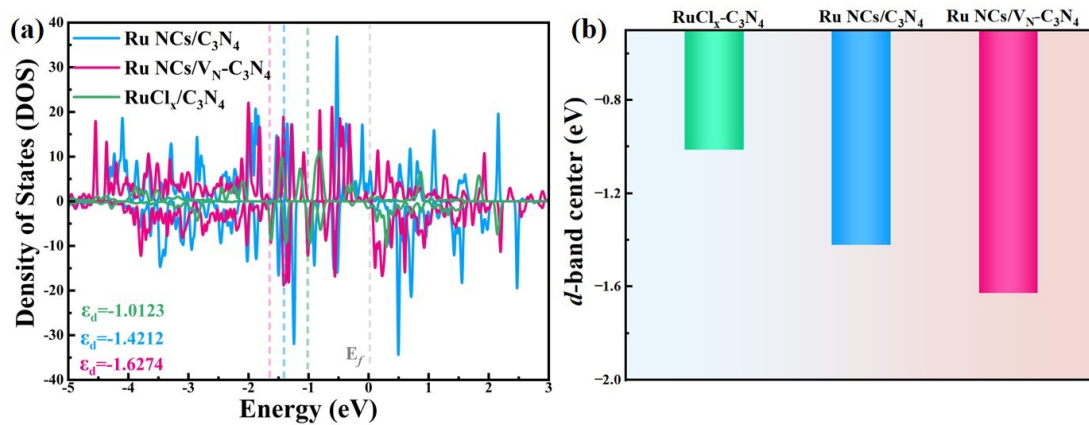

**Fig. S27** (a) Calculated partial DOS of Ru NCs/ $V_N$ - $C_3N_4$ , Ru NCs/ $C_3N_4$  and RuCl $_x$ - $C_3N_4$ . (b) Calculated  $d$ -band center of Ru NCs/ $V_N$ - $C_3N_4$ , Ru NCs/ $C_3N_4$  and RuCl $_x$ - $C_3N_4$ .

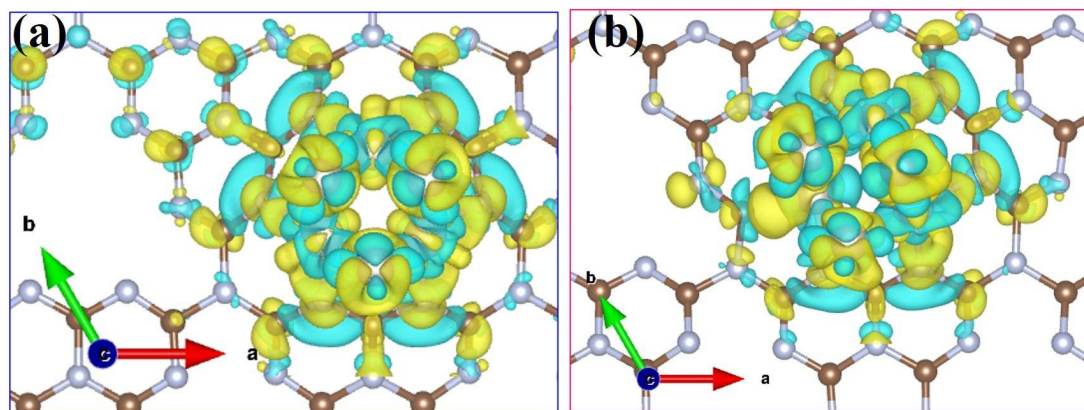

**Fig. S28** The charge density difference analysis for (a) Ru NCs/C<sub>3</sub>N<sub>4</sub> and (b) Ru NCs/V<sub>N</sub>-C<sub>3</sub>N<sub>4</sub>. (Yellow and blue contours represent electron accumulation and depletion, respectively).

### 3 Appendix Table

**Table S1** Element analysis results of g-C<sub>3</sub>N<sub>4</sub>, C<sub>3</sub>N<sub>4</sub>-Ar, RuCl<sub>x</sub>-C<sub>3</sub>N<sub>4</sub> and Ru NCs/V<sub>N</sub>-C<sub>3</sub>N<sub>4</sub>.

| Sample                                               | Repeat | C [%] | N [%] | N/C      |
|------------------------------------------------------|--------|-------|-------|----------|
| g-C <sub>3</sub> N <sub>4</sub>                      | #1     | 34.79 | 60.89 | 1.750216 |
|                                                      | #2     | 34.65 | 60.61 | 1.749206 |
|                                                      | #3     | 34.63 | 60.53 | 1.747906 |
| RuCl <sub>x</sub> -C <sub>3</sub> N <sub>4</sub>     | #1     | 24.23 | 41.99 | 1.732976 |
|                                                      | #2     | 24.37 | 42.04 | 1.725072 |
|                                                      | #3     | 24.31 | 41.96 | 1.726039 |
| Ru NCs/V <sub>N</sub> -C <sub>3</sub> N <sub>4</sub> | #1     | 8.07  | 13.44 | 1.665428 |
|                                                      | #2     | 8.6   | 13.98 | 1.625581 |
|                                                      | #3     | 7.59  | 12.77 | 1.682477 |
| C <sub>3</sub> N <sub>4</sub> -Ar                    | #1     | 34.24 | 59.87 | 1.748540 |
|                                                      | #2     | 34.23 | 59.84 | 1.748174 |
|                                                      | #3     | 34.11 | 59.75 | 1.751686 |

**Table S2** EXAFS fitting parameters at the Ru K-edge for various samples.

| Sample                                               | Shell  | N <sup>a</sup> | R (Å) <sup>b</sup> | $\sigma^2$ (Å <sup>2</sup> ·10 <sup>-3</sup> ) <sup>c</sup> | $\Delta E_0$ (eV) <sup>d</sup> | R factor (%) |
|------------------------------------------------------|--------|----------------|--------------------|-------------------------------------------------------------|--------------------------------|--------------|
| RuCl <sub>x</sub> -C <sub>3</sub> N <sub>4</sub>     | Ru-N   | 2.2            | 2.09               | 2.1                                                         | -2.8                           | 0.6          |
|                                                      | Ru-Cl  | 3.0            | 2.38               | 4.9                                                         | 6.5                            |              |
| Ru NCs/V <sub>N</sub> -C <sub>3</sub> N <sub>4</sub> | Ru-N/C | 1.7            | 1.99               | 1.9                                                         | 7.9                            | 0.7          |
|                                                      | Ru-Ru  | 6.8            | 2.68               | 5.4                                                         | 5.9                            |              |

<sup>a</sup> *N*: coordination numbers; <sup>b</sup> *R*: bond distance; <sup>c</sup>  $\sigma^2$ : Debye-Waller factors; <sup>d</sup>  $\Delta E_0$ : the inner potential correction. *R* factor: goodness of fit.  $S_0^2$  was set as 0.84/0.88/0.90 for Ru-N/O, Ru-Ru/Ru-Cl, which was obtained from the experimental EXAFS fit of reference RuO<sub>2</sub>/Ru foil/RuCl<sub>3</sub> by fixing CN as the known crystallographic value and was fixed to all the samples.

**Table S3** HER performance comparison of overpotential and Tafel slope with recently developed Ru-based bifunctional electrocatalysts.

| Samples                                                    | 10 mA cm <sup>-2</sup> | Tafel slope          | Ref.             |
|------------------------------------------------------------|------------------------|----------------------|------------------|
|                                                            | mV                     | mV dec <sup>-1</sup> |                  |
| Ru/Co-N-C-800 °C                                           | 23                     | 27.8                 | [24]             |
| CoFeP@Ru                                                   | 38                     | 21                   | [25]             |
| Ru@FeCoP                                                   | 11                     | 31.6                 | [26]             |
| Ru@B,N-CNTs                                                | 54                     | 90                   | [27]             |
| Ru-FeRu@C/NC                                               | 23                     | 23.7                 | [28]             |
| Ni <sub>3</sub> N/Ru/NCAC                                  | 42                     | 59                   | [29]             |
| CoNG/Ru                                                    | 15                     | 42.9                 | [30]             |
| RuO <sub>2</sub> /Co <sub>3</sub> O <sub>4</sub>           | 89                     | 91                   | [31]             |
| e-Ni <sub>0.6</sub> Ru <sub>0.4</sub> @C                   | 33                     | 30                   | [32]             |
| RuO <sub>2</sub> -Fe <sub>2</sub> O <sub>3</sub> /HrGO NSs | 239                    | 97                   | [33]             |
| Ru <sub>1</sub> Co <sub>2</sub> NP                         | 188                    | 66.5                 | [34]             |
| <b>Ru NCs/V<sub>N</sub>-C<sub>3</sub>N<sub>4</sub></b>     | <b>8</b>               | <b>24</b>            | <b>This work</b> |



**Table S4** Details about the calculation of mass activity for HER process.

| Samples                                  | RuCl <sub>x</sub> -C <sub>3</sub> N <sub>4</sub> | Ru NCs/V <sub>N</sub> -C <sub>3</sub> N <sub>4</sub> | Ru/C     | RuO <sub>2</sub> | Pt/C    |
|------------------------------------------|--------------------------------------------------|------------------------------------------------------|----------|------------------|---------|
| I <sub>100 mV</sub> /mA cm <sup>-2</sup> | 26.5                                             | <b>448.9</b>                                         | 161.9    | 102.0            | 198.6   |
| Loading/mg cm <sup>-2</sup>              | 3.0                                              | <b>3.0</b>                                           | 3.0      | 3.0              | 3.0     |
| Content (Ru)/wt%                         | 11.35                                            | <b>5.57</b>                                          | 5.00     | 75.95            | -       |
| Content (Pt)/wt%                         | -                                                | -                                                    | -        | -                | 20.00   |
| The actual loading of noble metals       | 0.341                                            | <b>0.167</b>                                         | 0.150    | 2.279            | 0.600   |
| Mass activity/A g <sup>-1</sup>          | 77.8                                             | <b>2685.5</b>                                        | 1079.3   | 44.8             | 331.0   |
| Mole activity/A mol <sup>-1</sup>        | 7865.6                                           | <b>271504.1</b>                                      | 109117.2 | 4529.3           | 64578.1 |

**Table S5** OER performance comparison of overpotential and Tafel slope with recently developed Ru-based bifunctional electrocatalysts.

| Samples                                                    | 10 mA cm <sup>-2</sup> | Tafel slope          | Ref.             |
|------------------------------------------------------------|------------------------|----------------------|------------------|
|                                                            | mV                     | mV dec <sup>-1</sup> |                  |
| Ru/Co-N-C-800 °C                                           | 276                    | 65.7                 | [24]             |
| CoFeP@Ru                                                   | 340                    | 58                   | [25]             |
| Ru@FeCoP                                                   | 212                    | 45.7                 | [26]             |
| Ru@B,N-CNTs                                                | 315                    | 61.5                 | [27]             |
| Ru-FeRu@C/NC                                               | 345                    | 64.7                 | [28]             |
| Ni <sub>3</sub> N/Ru/NCAC                                  | 288                    | 60                   | [29]             |
| CoNG/Ru                                                    | 350                    | 82.3                 | [30]             |
| RuO <sub>2</sub> /Co <sub>3</sub> O <sub>4</sub>           | 305                    | 69                   | [31]             |
| e-Ni <sub>0.6</sub> Ru <sub>0.4</sub> @C                   | 250                    | 46                   | [32]             |
| RuO <sub>2</sub> -Fe <sub>2</sub> O <sub>3</sub> /HrGO NSs | 386                    | 67                   | [33]             |
| Ru <sub>1</sub> Co <sub>2</sub> NP                         | 240                    | 54.4                 | [34]             |
| <b>Ru NCs/V<sub>N</sub>-C<sub>3</sub>N<sub>4</sub></b>     | <b>200</b>             | <b>60</b>            | <b>This work</b> |

**Table S6** The value of  $C_{dl}$ , ECSA and BET surface area for various samples.

| Samples                                                | $C_{dl}$ (mF cm <sup>-2</sup> ) | ECSA (cm <sub>ECSA</sub> <sup>2</sup> ) | BET surface area (m <sup>2</sup> g <sup>-1</sup> ) |
|--------------------------------------------------------|---------------------------------|-----------------------------------------|----------------------------------------------------|
| RuCl <sub>x</sub> -C <sub>3</sub> N <sub>4</sub>       | 8.8                             | 220                                     | 47.6                                               |
| <b>Ru NCs/V<sub>N</sub>-C<sub>3</sub>N<sub>4</sub></b> | <b>49.6</b>                     | <b>1240</b>                             | <b>128.5</b>                                       |
| Ru/C                                                   | 25.0                            | 625                                     | -                                                  |
| RuO <sub>2</sub>                                       | 27.4                            | 685                                     | -                                                  |

**Table S7** Details about the calculation of mass activity for OER process.

| Samples                            | RuCl <sub>x</sub> -C <sub>3</sub> N <sub>4</sub> | Ru NCs/V <sub>N</sub> -C <sub>3</sub> N <sub>4</sub> | Ru/C    | RuO <sub>2</sub> | Pt/C   |
|------------------------------------|--------------------------------------------------|------------------------------------------------------|---------|------------------|--------|
| $I_{1.6V}/\text{mA cm}^{-2}$       | 4.3                                              | 401.0                                                | 18.1    | 100.4            | 12.2   |
| Loading/mg cm <sup>-2</sup>        | 3.0                                              | 3.0                                                  | 3.0     | 3.0              | 3.0    |
| Content (Ru)/wt%                   | 11.35                                            | 5.57                                                 | 5.00    | 75.95            | -      |
| Content (Pt)/wt%                   | -                                                | -                                                    | -       | -                | 20.00  |
| The actual loading of noble metals | 0.341                                            | 0.167                                                | 0.150   | 2.279            | 0.600  |
| Mass activity/A g <sup>-1</sup>    | 12.6                                             | 2398.9                                               | 120.7   | 44.1             | 20.3   |
| Mole activity/A mol <sup>-1</sup>  | 1273.8                                           | 242528.8                                             | 12202.8 | 4458.5           | 3960.5 |

**Table S8** OWS performance comparison of cell voltage and stability with recently developed Ru-based bifunctional electrocatalysts.

| Samples                                                    | 10 mA cm <sup>-2</sup> | Stability                       | Ref.             |
|------------------------------------------------------------|------------------------|---------------------------------|------------------|
|                                                            | mV                     | Time (h)@10 mA cm <sup>-2</sup> |                  |
| Ru/Co–N–C-800 °C                                           | 1.500                  | 15                              | [24]             |
| CoFeP@Ru                                                   | 1.760                  | 10                              | [25]             |
| Ru@FeCoP                                                   | 1.540                  | 100                             | [26]             |
| Ru@B,N-CNTs                                                | 1.570                  | 40                              | [27]             |
| Ru-FeRu@C/NC                                               | 1.630                  | 50                              | [28]             |
| Ni <sub>3</sub> N/Ru/NCAC                                  | 1.550                  | 24                              | [29]             |
| CoNG/Ru                                                    | 1.580                  | 10                              | [30]             |
| RuO <sub>2</sub> /Co <sub>3</sub> O <sub>4</sub>           | 1.650                  | 11                              | [31]             |
| e-Ni <sub>0.6</sub> Ru <sub>0.4</sub> @C                   | 1.520                  | 12                              | [32]             |
| RuO <sub>2</sub> -Fe <sub>2</sub> O <sub>3</sub> /HrGO NSs | 1.860                  | 16                              | [33]             |
| Ru <sub>1</sub> Co <sub>2</sub> NP                         | 1.590                  | 10                              | [34]             |
| <b>Ru NCs/V<sub>N</sub>-C<sub>3</sub>N<sub>4</sub></b>     | <b>1.488</b>           | <b>40</b>                       | <b>This work</b> |

## 4 References

1. H. A. Gasteiger, N. Markovic, P. N. Ross, Jr. and E. J. Cairns, *The Journal of Physical Chemistry*, 1994, **98**, 617-625.
2. H. A. Gasteiger, N. M. Markovic and P. N. Ross, Jr., *The Journal of Physical Chemistry*, 1995, **99**, 16757-16767.
3. H. A. Gasteiger, N. M. Markovic and P. N. Ross, Jr., *The Journal of Physical Chemistry*, 1995, **99**, 16757-16767.
4. Q. Hu, K. Gao, X. Wang, H. Zheng, J. Cao, L. Mi, Q. Huo, H. Yang, J. Liu and C. He, *Nat. Commun.*, 2022, **13**, 3958.
5. Q. Wang, C.-Q. Xu, W. Liu, S.-F. Hung, H. Bin Yang, J. Gao, W. Cai, H. M. Chen, J. Li and B. Liu, *Nat. Commun.*, 2020, **11**, 4246.
6. D. C. Koningsberger and R. Prins, 1987, **92**.
7. J. J. Rehr and R. C. Albers, *Reviews of Modern Physics*, 2000, **72**, 621-654.
8. B. Ravel and M. Newville, *J. Synchrotron Radiat.*, 2005, **12**, 537-541.
9. W. Kohn and L. J. Sham, *Phys. Rev.*, 1965, **140**, A1133-1138.
10. P. E. Blöchl, *Phys. Rev. B*, 1994, **50**, 17953-17979.
11. G. Kresse and D. Joubert, *Phys. Rev. B*, 1999, **59**, 1758-1775.
12. J. P. Perdew and Y. Wang, *Phys. Rev. B*, 1992, **45**, 13244-13249.
13. G. Kresse and J. Hafner, *Phys. Rev. B*, 1993, **47**, 558-561.
14. G. Kresse and J. Furthmüller, *Phys. Rev. B*, 1996, **54**, 11169-11186.
15. G. Kresse and J. Furthmüller, *Computational Materials Science*, 1996, **6**, 15-50.
16. J. P. Perdew, K. Burke and M. Ernzerhof, *Phys. Rev. Lett.*, 1996, **77**, 3865-3868.
17. S. Grimme, J. Antony, S. Ehrlich and H. Krieg, *J. Chem. Phys.*, 2010, **132**, 154104.
18. Y. Zheng, Y. Jiao, Y. H. Zhu, L. H. Li, Y. Han, Y. Chen, A. J. Du, M. Jaroniec and S. Z. Qiao, *Nat. Commun.*, 2014, **5**, 1-8.
19. J. K. Nørskov, T. Bligaard, A. Logadottir, J. Kitchin, J. G. Chen, S. Pandalov and U. Stimming, *Journal of The Electrochemical Society*, 2005, **152**, J23-J26.
20. J. K. Nørskov, J. Rossmeisl, A. Logadottir, L. Lindqvist, J. Kitchin, T. Bligaard and H. Jonsson, *The Journal of Physical Chemistry B*, 2004, **108**, 17886-17892.
21. D. R. Lide, *CRC press*, 2004, **85**.
22. X. Wang, K. Maeda, A. Thomas, K. Takanabe, G. Xin, J. M. Carlsson, K. Domen and M. Antonietti, *Nat. Mater.*, 2009, **8**, 76-80.

23. J. Lv, L. Wang, R. Li, K. Zhang, D. Zhao, Y. Li, X. Li, X. Huang and G. Wang, *ACS Catal.*, 2021, **11**, 14338-14351.
24. C. Rong, X. Shen, Y. Wang, L. Thomsen, T. Zhao, Y. Li, X. Lu, R. Amal and C. Zhao, *Adv. Mater.*, 2022, **34**, 2110103.
25. S. Liu, X. Mu, P. Ji, Y. Lv, L. Wang, Q. Zhou, C. Chen and S. Mu, *ChemCatChem*, 2020, **12**, 5149-5155.
26. Y. Wang, Y. Du, Z. Fu, J. Ren, Y. Fu and L. Wang, *J. Mater. Chem. A*, 2022, **10**, 16071-16079.
27. M. Fan, X. Chen, M. Zhang, L. Cui, X. He and X. Zou, *Inorg. Chem. Front.*, 2022, **9**, 968-976.
28. W. Feng, Y. Feng, J. Chen, H. Wang, Y. Hu, T. Luo, C. Yuan, L. Cao, L. Feng and J. Huang, *Chem. Eng. J.*, 2022, **437**, 135456.
29. X. Zhao, X. Yong, Q. Ji, Z. Yang, Y. Song, Y. Sun, Z. Cai, J. Xu, L. Li, S. Shi, F. Chen, C. Li, P. Wang and J.-B. Baek, *J. Mater. Chem. A*, 2023.
30. T. He, Y. Peng, Q. Li, J. E. Lu, Q. Liu, R. Mercado, Y. Chen, F. Nichols, Y. Zhang and S. Chen, *ACS Appl. Mater. Inter.*, 2019, **11**, 46912-46919.
31. H. Liu, G. Xia, R. Zhang, P. Jiang, J. Chen and Q. Chen, *RSC Advances*, 2017, **7**, 3686-3694.
32. Q. Yang, P. Jin, B. Liu, L. Zhao, J. Cai, Z. Wei, S. Zuo, J. Zhang and L. Feng, *J. Mater. Chem. A*, 2020, **8**, 9049-9057.
33. H. Mosallaei, H. Hadadzadeh, A. A. Ensafi, K. Z. Mousaabadi, M. Weil, A. Foelske and M. Sauer, *Int. J. Hydrogen Energy*, 2022.
34. Y. Bao, J. Dai, J. Zhao, Y. Wu, C. Li, L. Ji, X. Zhang and F. Yang, *ACS Applied Energy Materials*, 2020, **3**, 1869-1874.
